# Supplementary material for: Probiotic and anti-inflammatory attributes of an isolate Lactobacillus helveticus NS8 from Mongolian fermented koumiss
Source: PubMed Central journal article supplement (PMC4591576; doi:10.1186/s12866-015-0525-2), 2015-10-02
Supplement: 12866_2015_525_MOESM1_ESM.pdf [file 12866_2015_525_MOESM1_ESM.pdf]

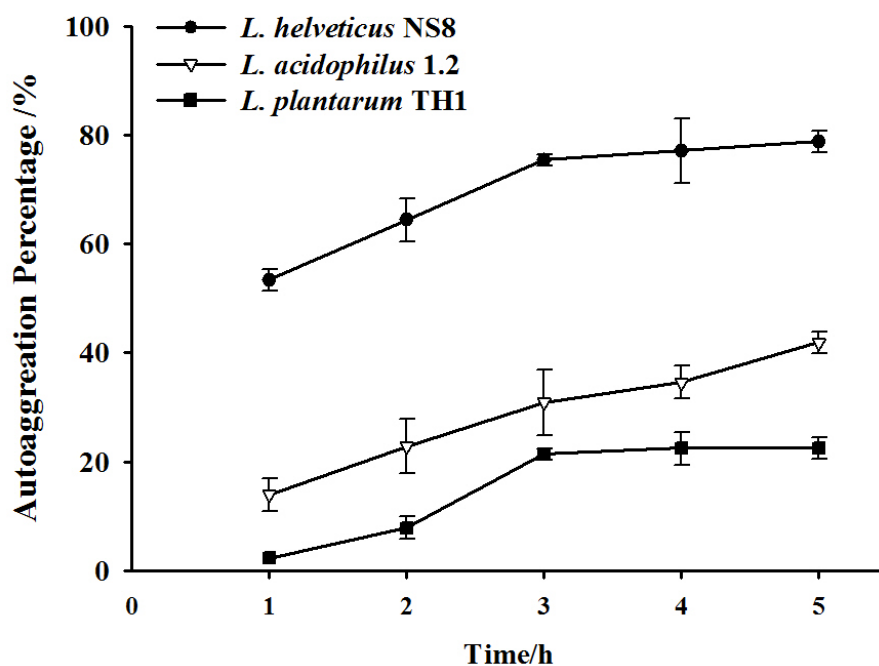

**Figure. Autoaggregation percentage of *L. helveticus* NS8 in 5 hours.**

The sedimentation rate of strains was measured over a period of 5 h under identical conditions. NS8 isolate exhibited the highest cell autoaggregation. The autoaggregating phenotype of NS8 was so strong that over half bacterium have formed a precipitate in 1 h, while other bacterial suspensions showed constant turbidity with little precipitate.
