# Supplementary material for: Probiotic and anti-inflammatory attributes of an isolate Lactobacillus helveticus NS8 from Mongolian fermented koumiss
Source: PubMed Central journal article supplement (PMC4591576; doi:10.1186/s12866-015-0525-2), 2015-10-02
Supplement: 12866_2015_525_MOESM2_ESM.pdf [file 12866_2015_525_MOESM2_ESM.pdf]

**Table.** Lewis acid-base characteristics of the bacterial cell surfaces

| <b>Bacteria</b>           | <b>Hydrophobicity (%)</b> |                      |
|---------------------------|---------------------------|----------------------|
|                           | <b>Chloroform</b>         | <b>Ethyl acetate</b> |
| <i>L. helveticus</i> NS8  | 53.1 ± 0.8                | 60.8 ± 3.9           |
| <i>L. acidophilus</i> 1.2 | 69.2 ± 1.3                | 74.1 ± 0.3           |
| <i>L. plantarum</i> TH1   | 55.1 ± 1.5                | 64.5 ± 0.9           |

Adhesion to chloroform (electron acceptor) and ethyl acetate (electron donor) was also tested to assess the Lewis acid-base characteristics of the bacterial cell surfaces. All the strains didn't show significant difference between the affinity to chloroform and to ethyl acetate.
